# Supplementary material
Source: MDPI journal article supplement (https://www.mdpi.com/2673-9992/15/1/10)
Supplement: s1 [file s1]

Archive with 2 entries (2 files):
- Conference Poster.pdf
- msf-2144308-supplementary S1.png
