# Supplementary material
Source: MDPI journal article supplement (https://www.mdpi.com/2673-9992/15/1/10)

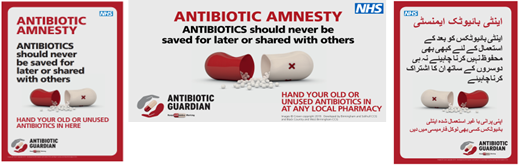

Supplement: s1 [file s1 › msf-2144308-supplementary S1.png]
